# Supplementary material for: Autophagy-Related Protein ATG18 Regulates Apicoplast Biogenesis in Apicomplexan Parasites
Source: PubMed Central journal article supplement (PMC5666157; doi:10.1128/mbio.01468-17), 2017-10-31
Supplement: mbo005173561sf1.pdf [file mbo005173561sf1.pdf]

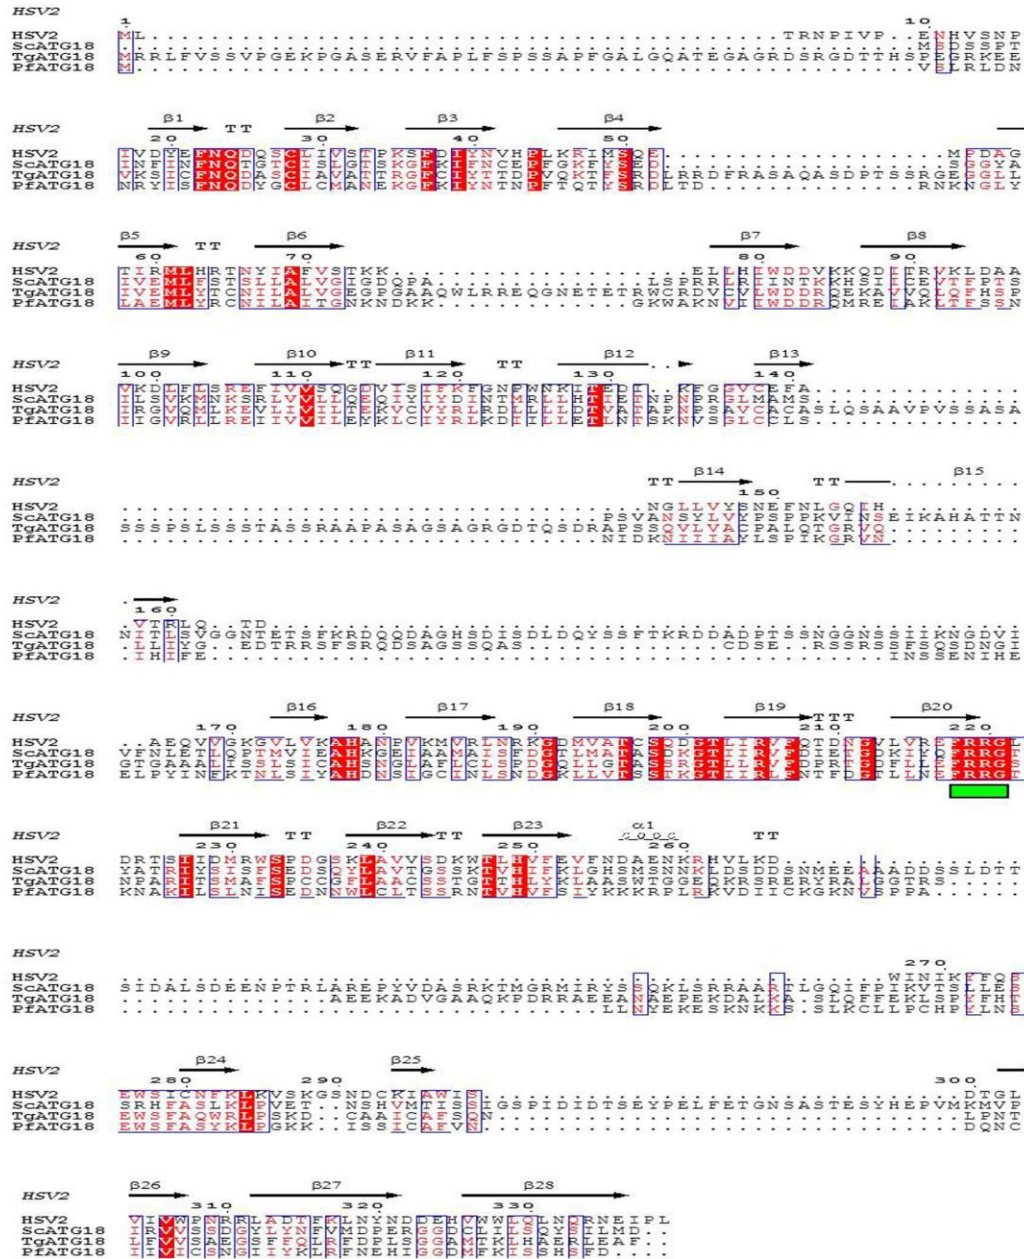

**Supplementary Figure S1:** Sequence comparison of PfATG18 and TgATG18 with ScATG18.

Structure based sequence alignment of Pf/TgATG18 with ScATG18 and Hsv2 was performed using the crystal structure of Hsv2 [(PDB ID 4AV9; and (Krick et al., 2012)]. Multiple sequence alignment was done using PROMALS3D and visualized by ESPirit3.0. Approximate position of the secondary structure elements is indicated and the FRRG motif is indicated by a green bar.
