# Supplementary material for: Autophagy-Related Protein ATG18 Regulates Apicoplast Biogenesis in Apicomplexan Parasites
Source: PubMed Central journal article supplement (PMC5666157; doi:10.1128/mbio.01468-17), 2017-10-31
Supplement: mbo005173561sf2.pdf [file mbo005173561sf2.pdf]

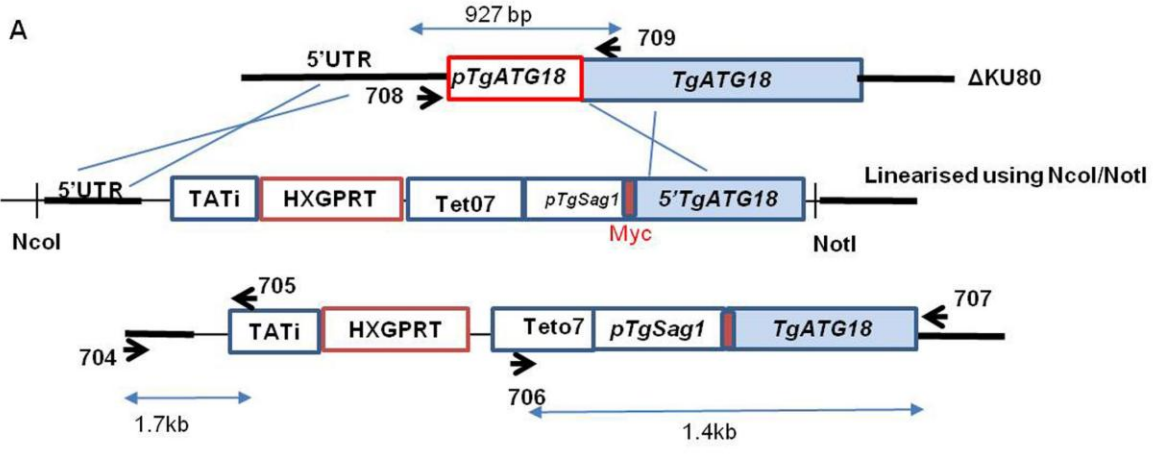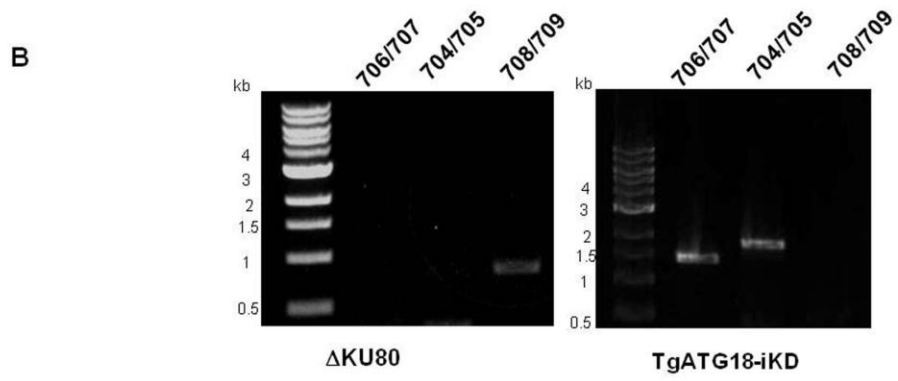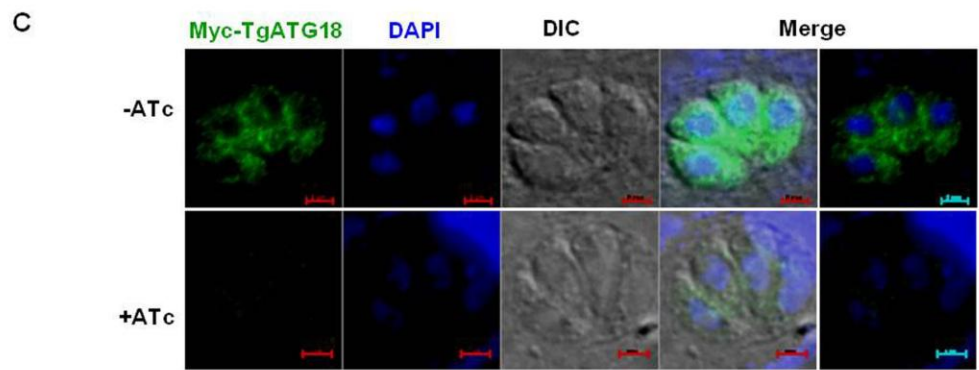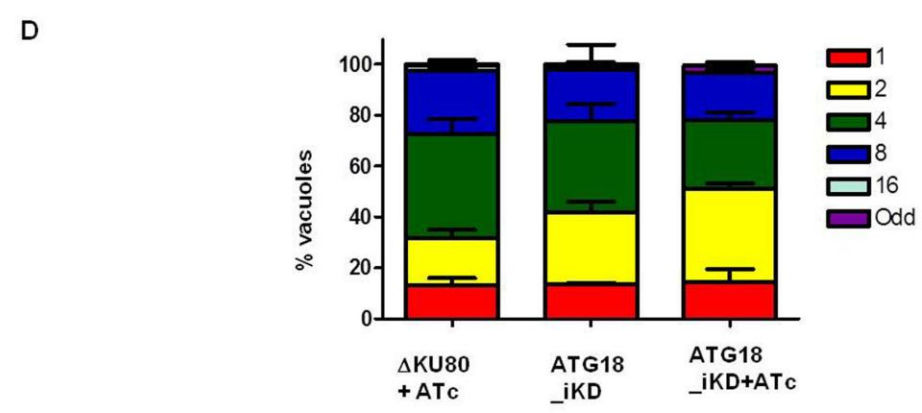

**Supplementary Figure S2: Generation and analysis of TgATG18-iKD parasites**

A. Schematic representation of the strategy used to generate TgATG18-iKD parasites. A plasmid construct that allowed insertion of transactivator TATi-1 and replacement of *TgATG18* promoter with the 7tet-Op SAG1 (TetO7) inducible promoter was introduced by homologous recombination in TgATG18 locus. In addition, a Myc tag was inserted at the N-terminus of TgATG18. After transfection, the drug selected parasites were cloned by limiting dilution.

B. Genotyping of *TgATG18*-iKD parasites. The data shown is for one of the two independent clones obtained, which was used for the reported studies. PCR amplification of the unmodified and recombined locus was performed using indicated primers; primer 708/709 for endogenous, 704/705 for 5'-integration and 706/707 for 3'-integration of the recombined locus. PCR products of expected size were obtained and the endogenous locus was absent in the transgenic TgATG18-iKD parasites. The amplicon obtained by primer set 704/705 and 706/707 was cloned and sequenced, which confirmed the integration at the expected site.

C. IFA was performed on TgATG18-iKD parasites in which Myc-tag is fused to TgATG18 (panel A) using anti-myc antibody after 48h of ATc treatment.

D. Intracellular replication of TgATG18-iKD parasites after one cycle of ATc treatment.

TgATG18-iKD or  $\Delta$ Ku80 were left untreated or treated with ATc and the number of parasites per vacuole was determined after 24h. Data represent SEM $\pm$  SE, n=3 and at least 200 vacuoles were counted for each condition.
