# Supplementary material for: Autophagy-Related Protein ATG18 Regulates Apicoplast Biogenesis in Apicomplexan Parasites
Source: PubMed Central journal article supplement (PMC5666157; doi:10.1128/mbio.01468-17), 2017-10-31
Supplement: mbo005173561sf5.pdf [file mbo005173561sf5.pdf]

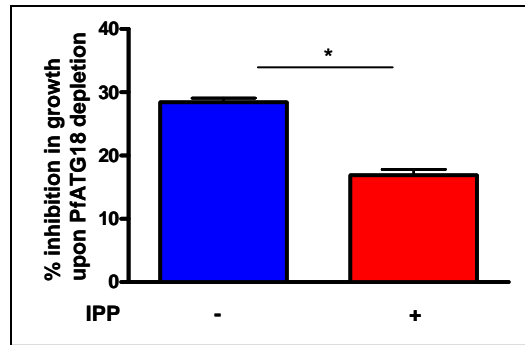

**Supplementary Figure S5:** Effect of IPP on growth of PfATG18 depleted parasites.

PfATG18-3HA-DD parasites grown in the presence or absence of Shld-1 as described in main text. In addition, in one set of Shld-1 (-) parasites 200  $\mu$ M IPP was added. Parasite growth was measured using a SYBR-green based assay after 144h. % inhibition in growth of Shld-1 deprived parasites in comparison to Shld-1 treated parasites (100%) is represented [SEM $\pm$  SE, n=3 (t-test, \*, p<0.05)].
