# Supplementary material for: Autophagy-Related Protein ATG18 Regulates Apicoplast Biogenesis in Apicomplexan Parasites
Source: PubMed Central journal article supplement (PMC5666157; doi:10.1128/mbio.01468-17), 2017-10-31
Supplement: mbo005173561sf6.pdf [file mbo005173561sf6.pdf]

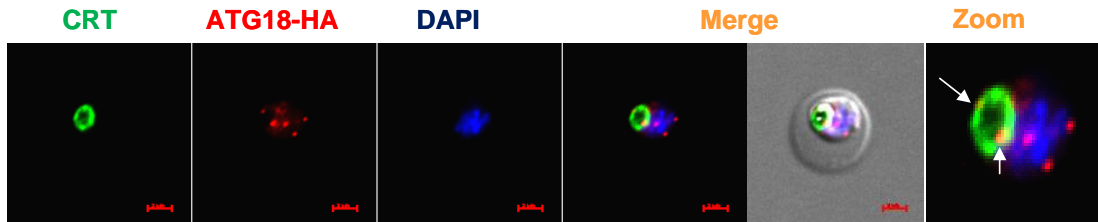

**Supplementary Figure S6: PfATG18 localization in *P. falciparum*.**

IFA was performed on parasites PfATG18-3HA-DD<sup>epi</sup> overexpressing PfATG18 using anti-HA and anti-CRT antibody, which stains the food vacuole membrane. Some PfATG18 positive puncta were found in close proximity of FV (indicated by arrows).
