# Supplementary material for: Autophagy-Related Protein ATG18 Regulates Apicoplast Biogenesis in Apicomplexan Parasites
Source: PubMed Central journal article supplement (PMC5666157; doi:10.1128/mbio.01468-17), 2017-10-31
Supplement: mbo005173561sf7.pdf [file mbo005173561sf7.pdf]

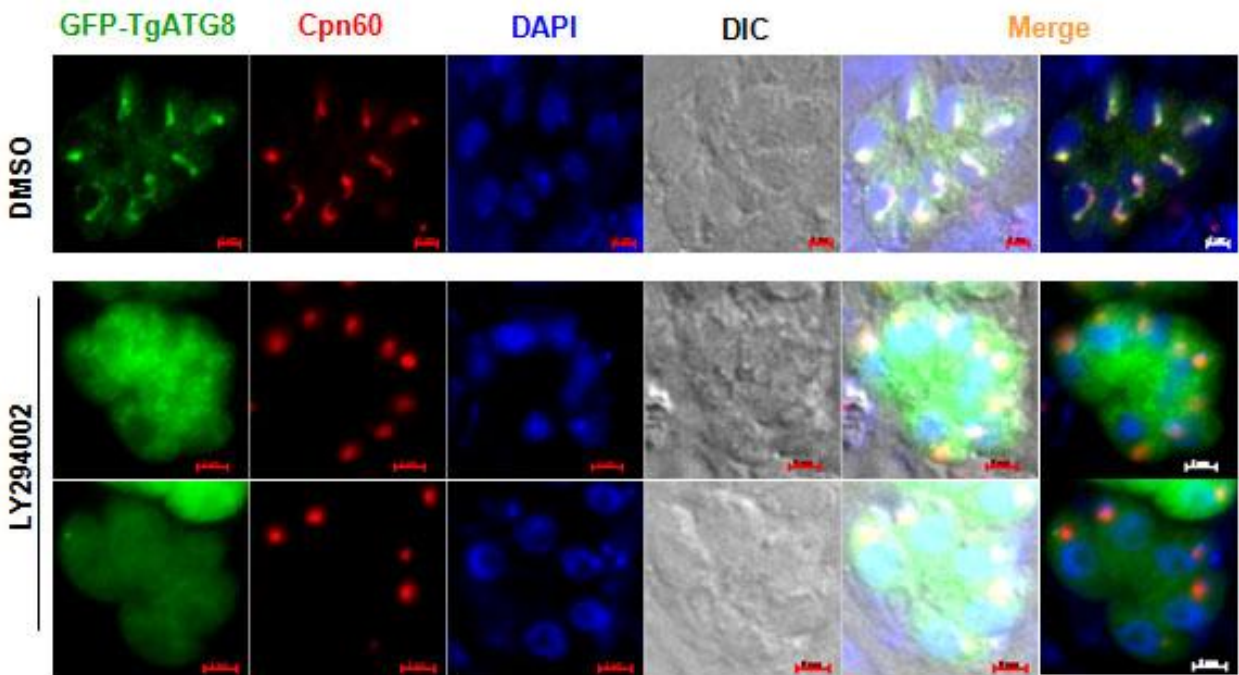

**Supplementary Figure S7:** Effect of LY294002 on TgATG8 localization

Parasites expressing GFP-TgATG8 were grown for 24 hours followed by treatment with 50  $\mu$ M LY294002 for 2 hours. Cells were fixed using 4% PFA in PBS and IFA was performed as described earlier using Cpn60 antibody. LY294002-treatment prevented TgATG8 localization on apicoplast.
